# Supplementary material for: Conformational switching in the coiled-coil domains of a proteasomal ATPase regulates substrate processing
Source: PubMed Central journal article supplement (PMC6006169; doi:10.1038/s41467-018-04731-6), 2018-06-18
Supplement: 41467_2018_4731_MOESM1_ESM.pdf [file 41467_2018_4731_MOESM1_ESM.pdf]

**CONFORMATIONAL SWITCHING IN THE COILED-COIL DOMAINS OF A  
PROTEASOMAL ATPASE REGULATES SUBSTRATE PROCESSING**

Snoberger et al.

Supplementary Information

Supplementary Tables 1-2, Supplementary Figures 1-8

\*correspondence to  
David M. Smith  
[dmsmith@hsc.wvu.edu](mailto:dmsmith@hsc.wvu.edu)

**Supplementary Table 1: Summary of ATP Hydrolysis Kinetics of PAN Variants Under Oxidizing and Reducing Conditions**

|           | <u>Reduced</u>                                      |                |           |                 | <u>Oxidized</u>                                     |                |                     |                 |
|-----------|-----------------------------------------------------|----------------|-----------|-----------------|-----------------------------------------------------|----------------|---------------------|-----------------|
|           | Vmax<br>(ATP·PAN <sup>-1</sup> ·min <sup>-1</sup> ) | Km<br>[ATP] μM | Hill      | CC<br>Crosslink | Vmax<br>(ATP·PAN <sup>-1</sup> ·min <sup>-1</sup> ) | Km<br>[ATP] μM | Hill                | CC<br>Crosslink |
| WT PAN    | 61.2 ± 2                                            | 507 ± 37       | 1.8 ± 0.2 | None            | 55.9 ± 2.9                                          | 457 ± 56       | 1.7 ± 0.3           | None            |
| M87C      | 53.8 ± 1.9                                          | 413 ± 34       | 1.8 ± 0.2 | None            | 52.7 ± 2.3                                          | 497 ± 48       | 1.8 ± 0.1           | C1              |
| 59C       | 48.1 ± 1.4                                          | 436 ± 29       | 1.8 ± 0.2 | None            | 56 ± 2                                              | 443 ± 36       | 1.8 ± 0.2           | C1+C2           |
| 87+73C    | 42.2 ± 1                                            | 556 ± 29       | 1.8 ± 0.1 | None            | could not determine                                 | >3000          | could not determine | C1+C3           |
| 87+73+59C | 51.3 ± 2.6                                          | 580 ± 64       | 1.8 ± 0.3 | None            | 53 ± 3                                              | 637 ± 83       | 1.6 ± 0.3           | C1+C2           |

Values are calculated from curves in **Supplementary Fig. 6**. Values are derived from means ± standard deviations of 3 independent experiments (n=3). 87+73C-oxidized values could not be determined because data did not fit a Michaelis-Menton Curve.

## **Supplementary Table 2: Normalized ATP Hydrolysis of PAN Variants**

|           | Reduced Vmax (normalized) | Oxidized Vmax (Normalized) |
|-----------|---------------------------|----------------------------|
| WT PAN    | 100 ± 3.3%                | 100 ± 5.2%                 |
| M87C      | 100 ± 3.5%                | 107 ± 4.7%                 |
| 59C       | 100 ± 2.9%                | 128 ± 4.6% **              |
| 87+73C    | 100 ± 2.4%                | could not determine        |
| 87+73+59C | 100 ± 5.1%                | 113 ± 6.4%                 |

Vmax values were calculated from curves in **Supplementary Fig. 6** and values in **Supplementary Table 1**. Vmax values were normalized to WT PAN controls and divided by the reduced form of the mutant. Values are derived from means ± standard deviations of 3 independent experiments (n=3). 87+73C-oxidized values could not be determined because data did not fit a Michaelis-Menton Curve. \*\* = p < 0.001

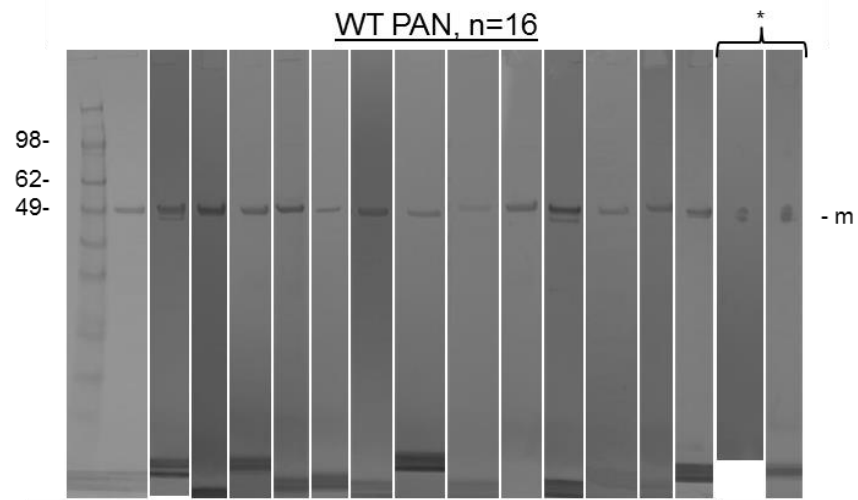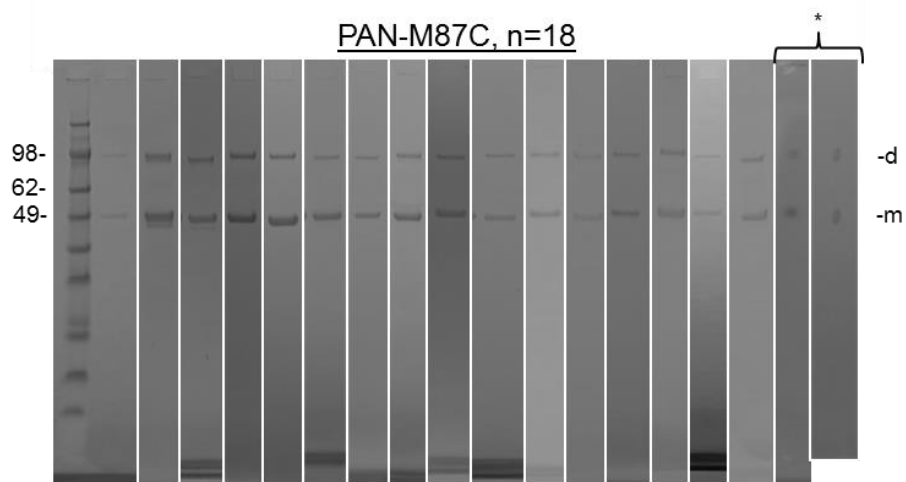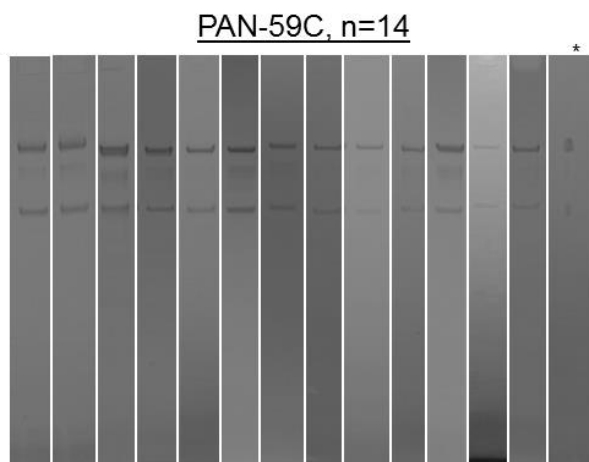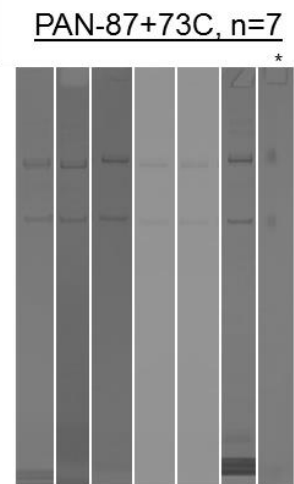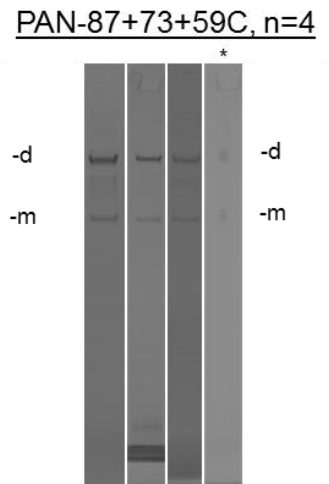

**Supplementary Figure 1:** Full-length lanes from nonreducing SDS-PAGE analysis for the mutants in this manuscript. 'm' indicates monomers and 'd' indicates dimers. Asterisks (\*) indicate 2-dimensional gels where a Native-PAGE was run, hexameric bands excised, then analyzed via non-reducing SDS-PAGE.

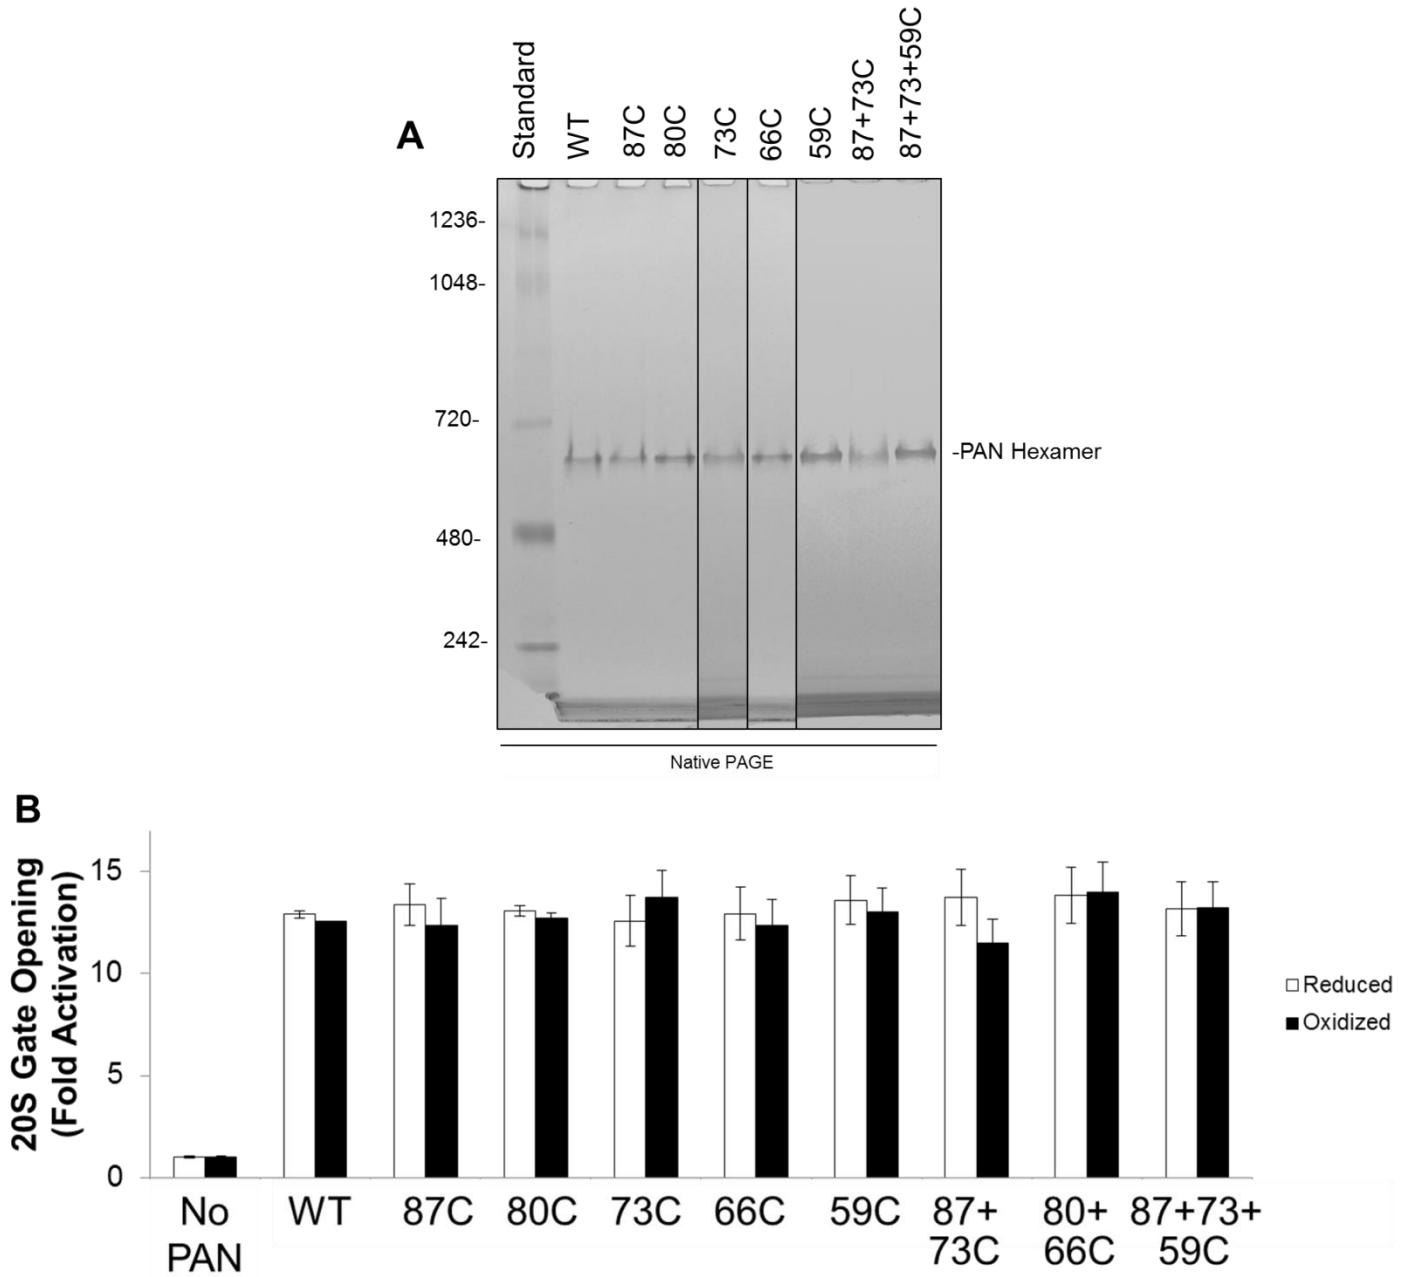

**Supplementary Figure 2: PAN Mutants Retain Global Quaternary Structure and T20S Gate Opening Capacity**

**A)** 2  $\mu$ g of oxidized PAN variants were run on Native-PAGE and analyzed for hexamer formation. Experiments were performed in triplicate. Representative data is presented is from 3 non-contiguous gels. Note that PAN runs on Native gels at a higher molecular weight than expected, likely due to differences in tertiary/quaternary structure of PAN compared to the standards used. **B)** The stimulation of 20S activity (caused by PAN-induced 20S gate opening) was measured using saturating PAN and 2 $\mu$ M of a fluorescent reporter nonapeptide (LFP) with 10 $\mu$ M ATP $\gamma$ S and 20mM MgCl<sub>2</sub> (see methods for details). The rate of LFP hydrolysis was calculated and fold stimulation of the 20S activity by PAN is shown. 20S alone control is considered 1-fold. Bar graphs are means  $\pm$  standard deviations (n=3).

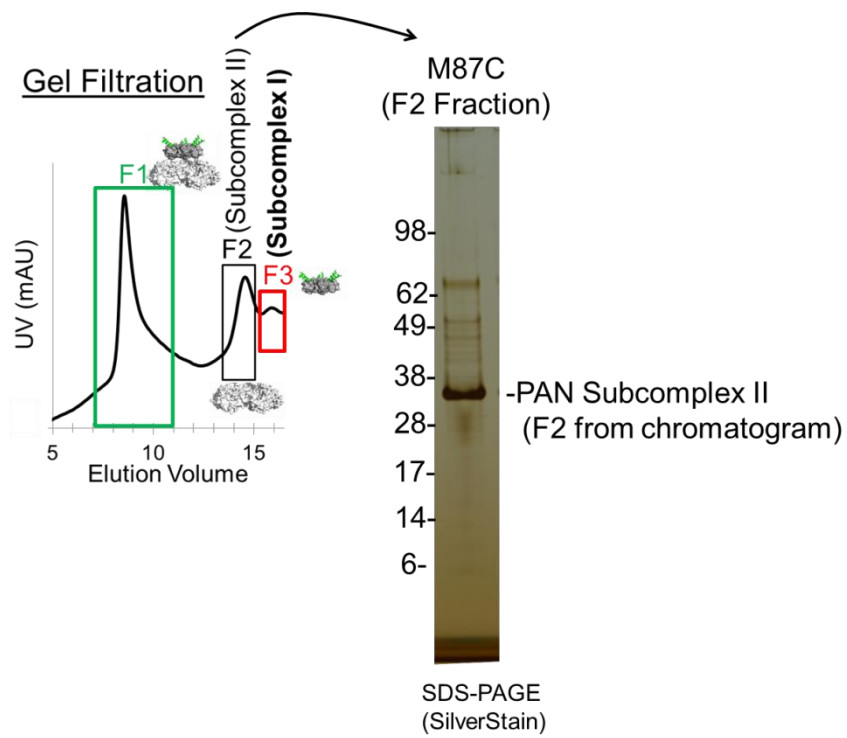

**Supplementary Figure 3:** SDS-PAGE of the “F2” PAN-M87C fragment. Partial proteolysis fragments of PAN were loaded onto a GE Superose 12 size exclusion column. The F2 fragment ran as a ~30-35kDa monomer, consistent with the monomeric size of PAN Subcomplex II (the AAA+ ATPase domain fragment).

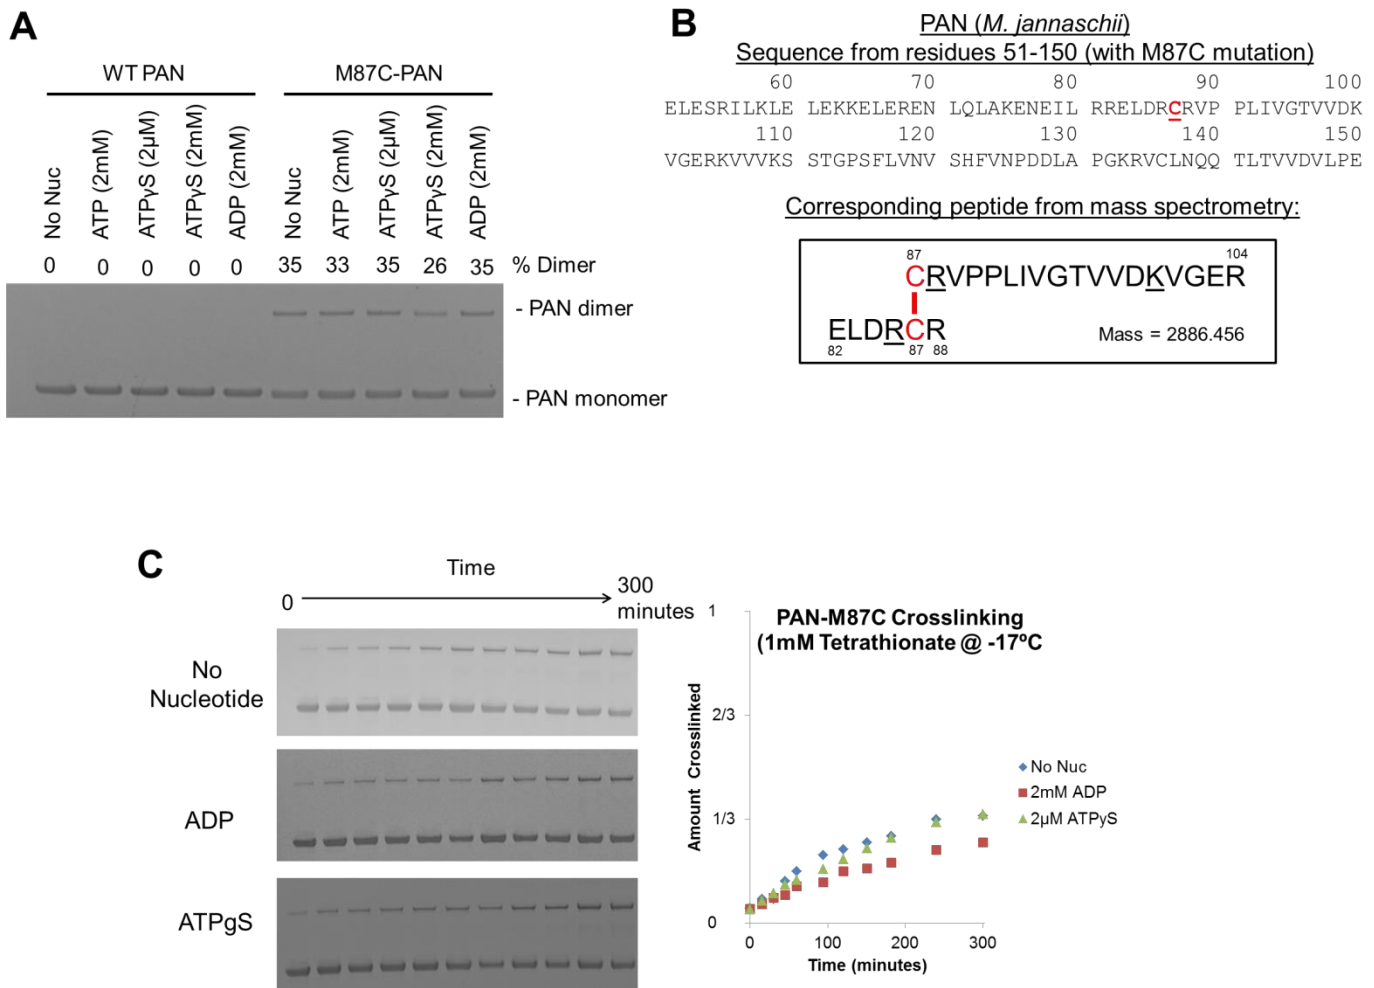

**Supplementary Figure 4: Natural levels of nucleotides have little effect on disulfide crosslinking of WT PAN or PAN-M87C.** **A)** 0.25mg/ml WT PAN or PAN-M87C was incubated for 1 hour @ room temperature with 1mM tetrathionate (and the indicated nucleotide + 10mM MgCl<sub>2</sub>). Note that the level of crosslinking is approximately the same regardless of the nucleotide bound, with the exception of high levels of ATPγS (2mM), which forces PAN into an unnatural 4-nucleotide bound conformation. **B)** Mass spectrometry of PAN-M87C reveals a peptide with a mass corresponding to a dimer with a disulfide crosslink at residue 87. **(top)** Sequence of PAN (*M. jannaschii*) from residues 51-150. The 87<sup>th</sup> residue mutated to cysteine is indicated in red. **(bottom)** A peptide of Mass = 2886.456 Da was found in the oxidized sample, which corresponds to 2 fragments of PAN that had been crosslinked at residue M87C. The fragment from the first monomer was from 87-104, and the peptide from second PAN monomer from 82-88. Note that both of these crosslinked fragments have missed trypsin cleavage sites (underlined), which is expected to occur when a disulfide bond occludes trypsin's access to these cut sites. **C)** PAN-M87C crosslinking timecourse. 0.25mg/ml PAN-M87C was reduced using 1mM dithiothreitol, desalted, and then incubated at (-17°C) for 0-300 minutes with 1mM tetrathionate and the indicated nucleotides. -17° temperatures were achieved with 11% NaCl in Ice Water (w/w), and 50% glycerol was used in samples to prevent freezing of samples. Left panel is raw SDS-PAGE data of these experiments, right panel is quantification of SDS-PAGE.

## A 'a' residue mutants

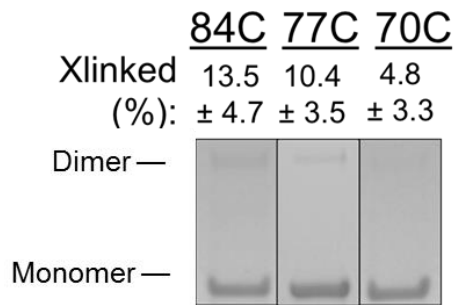

## B First Heptad Double Mutants (to test <1 heptad slide)

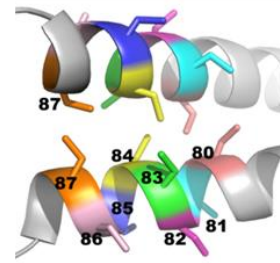

PDB: 3H43

## C

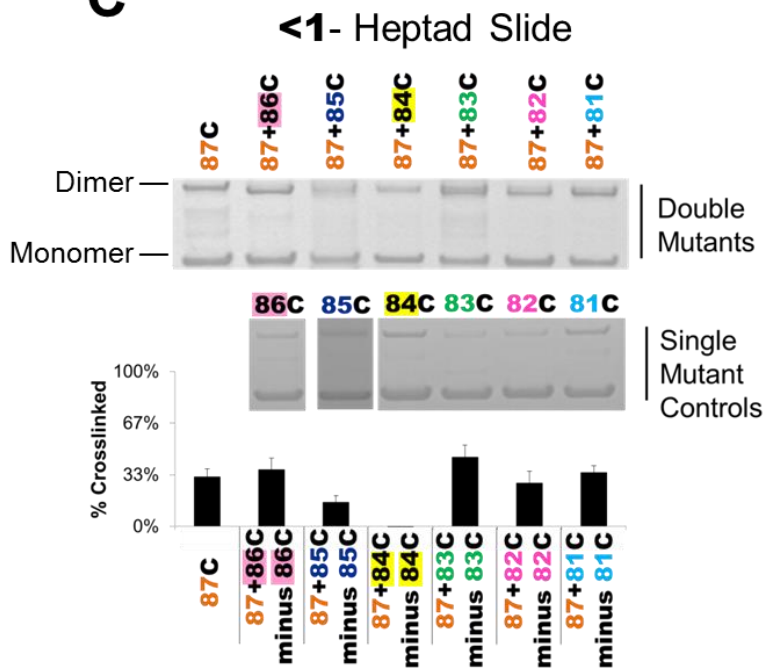

### Supplementary Figure 5: PAN does not adopt a partial heptad slide.

**A)** Residues in the 'a' position of the heptad repeat were mutated to cysteines and subjected to crosslinking and SDS-PAGE analysis. Values presented are means  $\pm$  standard deviations ( $n=3$ ). **B)** Crosslinking strategy to test every possible registry shift at less than 1 heptad. Point mutations of each residue in the first heptad were generated either alone (single mutants) or with residue M87C (orange, double mutants). **C)** The indicated double mutants and their single mutant controls were subjected to oxidizing conditions (1mM tetrathionate), desalted, and run on SDS-PAGE followed by coomassie staining. These mutants can crosslink in-register and in register slides of <1 heptad. This allowed the analysis of the level of crosslinking contributed by C1 (in-register CC) plus the level of crosslinking contributed by an out-of-register CC, since single mutants can only crosslink in-register CCs. Note: some of the double mutants have less than 33% crosslinking after the background single mutant control is subtracted, likely due to destabilization of the CC. Bar graphs represent the amount of crosslinked PAN less the single mutants controls (87C-  $n=18$ ,  $n=3$  for all others)



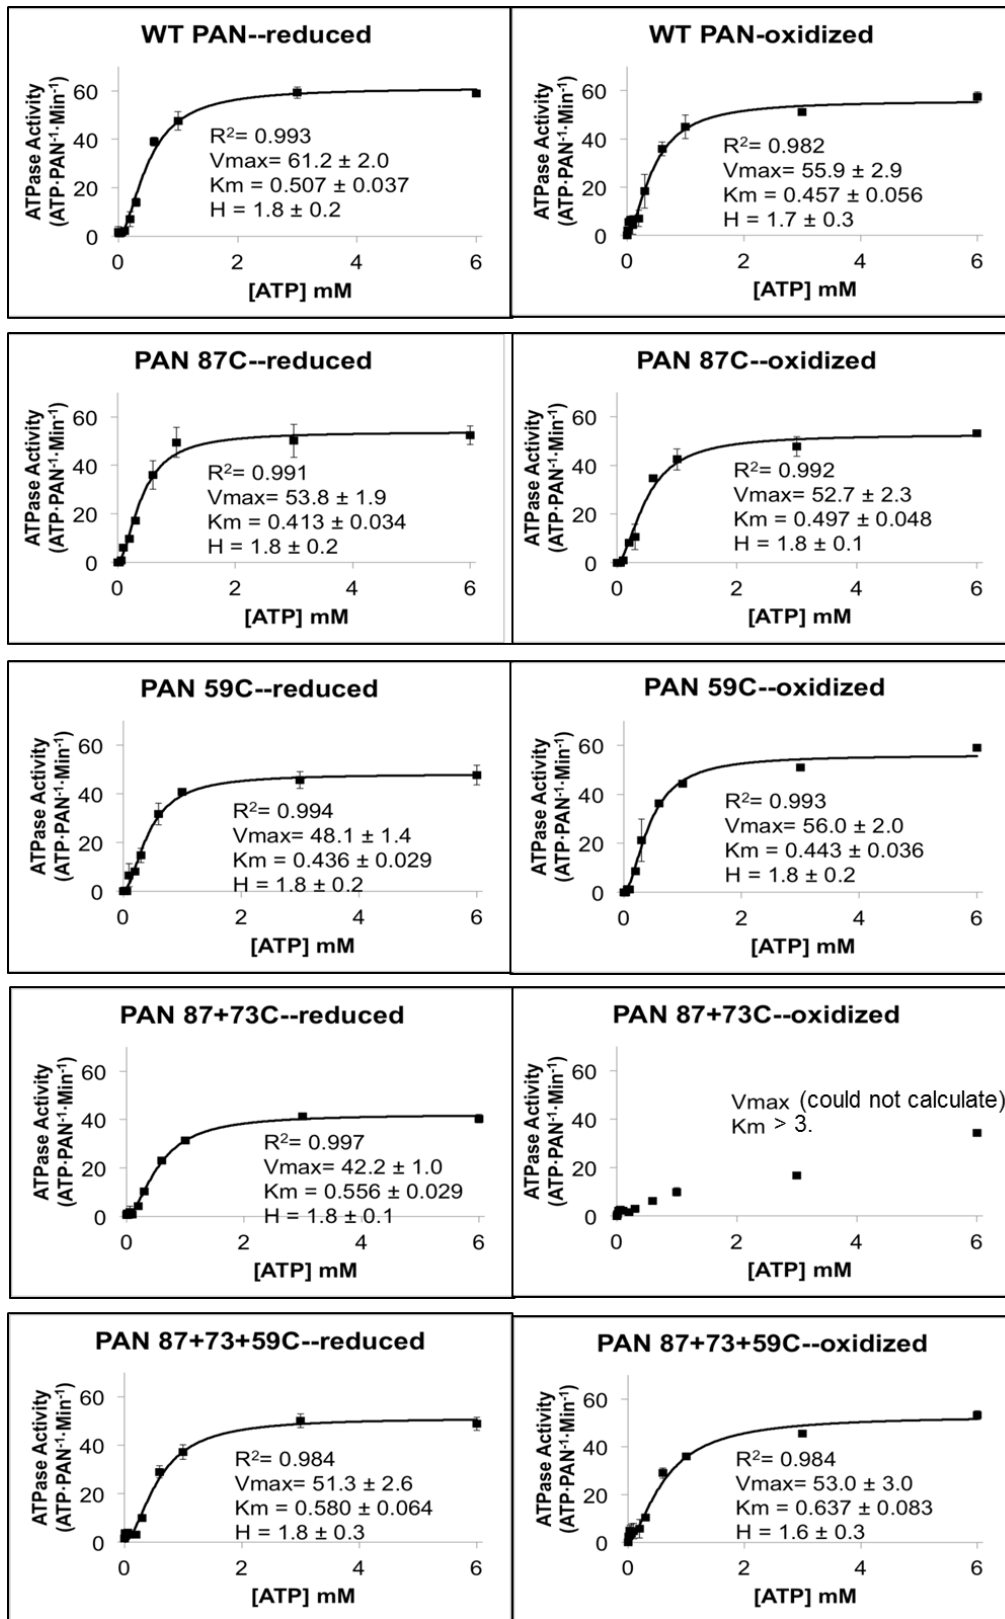

### Supplementary Figure 6: ATP hydrolysis kinetics of PAN mutants under oxidizing and reducing conditions

Increasing amounts of ATP (0-6 mM) were added to PAN variant (0.05 μM) under oxidizing and reducing conditions and ATPase activity was measured via NADH-coupled assay (see methods). Data points are means ± standard deviations (n=3). Data was fit to 3 parameter Michaelis-Menten curve and V<sub>max</sub>, K<sub>m</sub>, and Hill coefficients were extracted and are shown. The PAN 87+73C-oxidized variant did not fit a Michaelis-Menten curve.

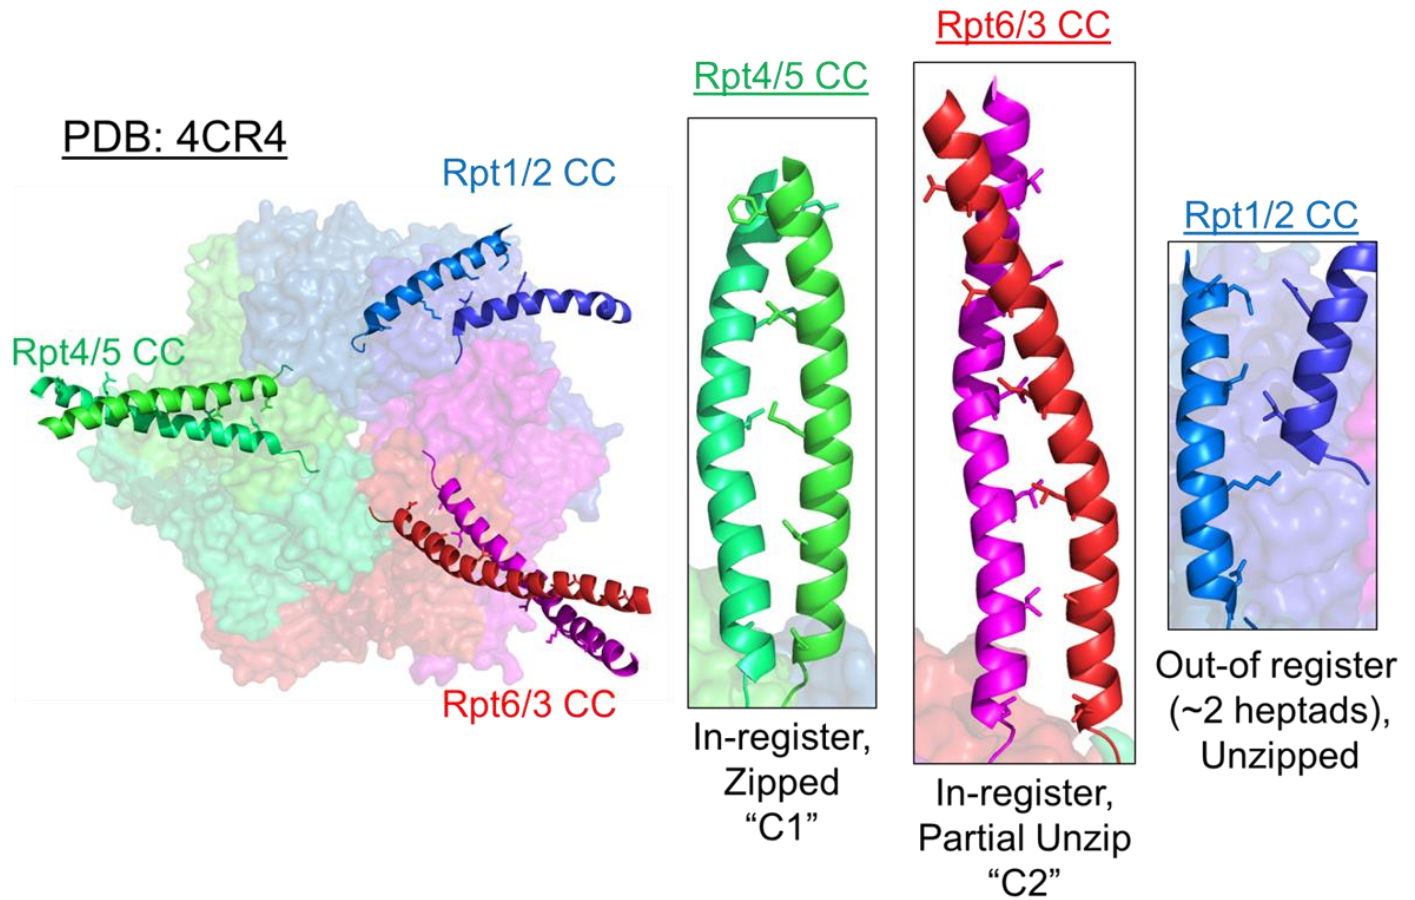

**Supplementary Figure 7: Asymmetric coiled-coil conformations are also observed in the 26S ATPases (PDB: 4CR4).**

In the 4CR4 cryo-EM structure, the Rpt4/5 CC is in-register and mostly zipped (C1-like), the Rpt6/3 CC is in-register and partially unzipped (C2-like), and the Rpt1/2 CC is 2 heptads out-of-register (C3-like), but appears unzipped, consistent with State #2 ("activated"), where the C1 and C2 CC conformations are crosslinkable, but not the C3 CC conformation.

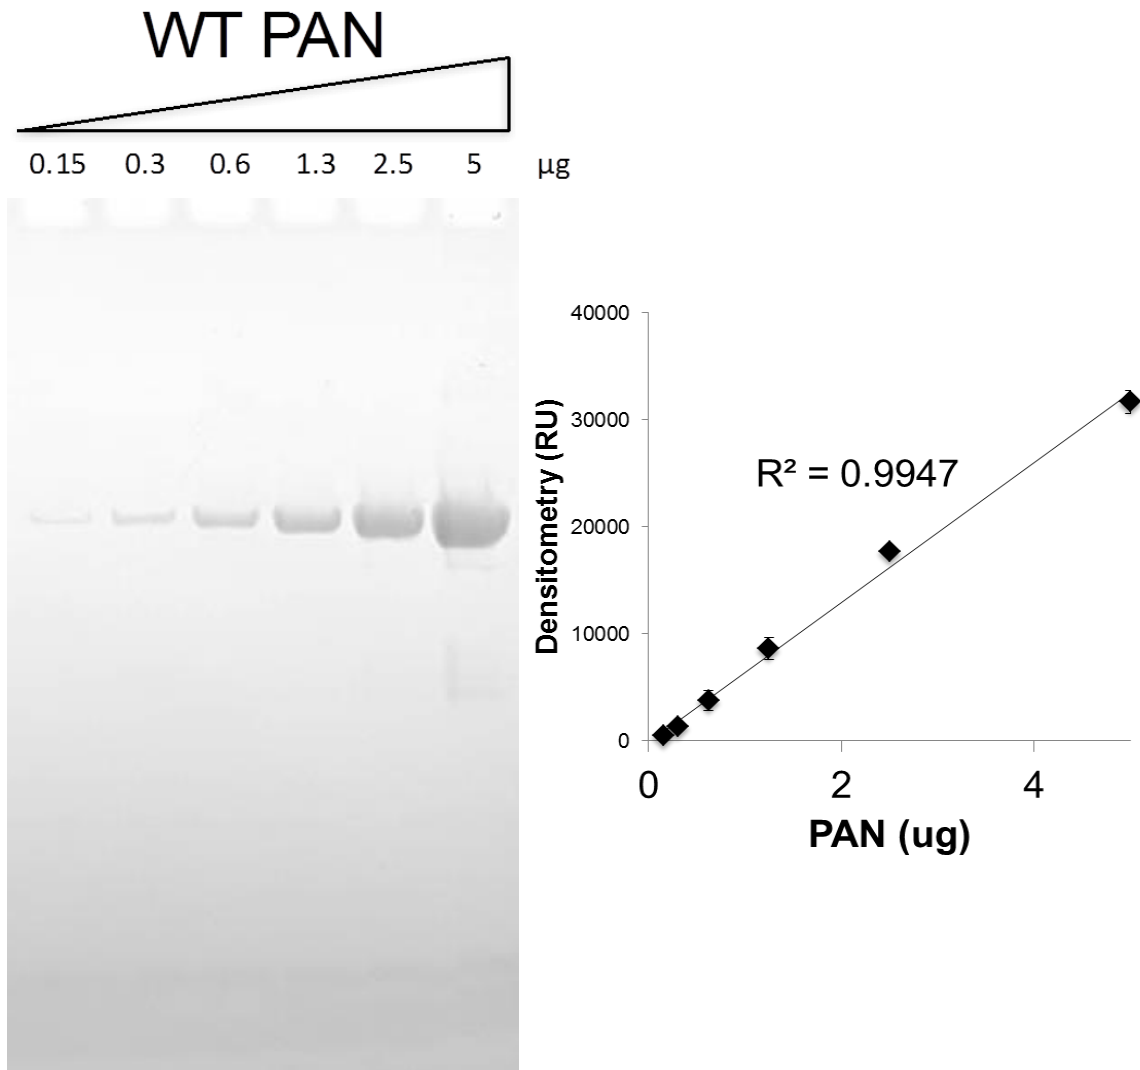

**Supplementary Figure 8: WT PAN dose response on SDS-PAGE.**

SDS-PAGE analysis of WT PAN dose response. Quantification (bottom) shows that densitometry increases linearly with PAN from 0.15-5 µg ( $R^2 = 0.99474$ ). Values are means  $\pm$  standard deviations of 3 independent experiments (n=3).
